# Supplementary material
Source: PubMed Central journal article supplement (PMC4074648)
Supplement: peds.2013-0333_peds.2013-0333SupplementaryData.pdf [file peds.2013-0333_peds.2013-0333SupplementaryData.pdf]

## Supplemental Information

**SUPPLEMENTAL TABLE 4** Regression Coefficients for Generalized Linear Model<sup>a</sup> of Hospitalization Costs

|                                        | Regression Coefficients | SE of Coefficients |
|----------------------------------------|-------------------------|--------------------|
| Intercept                              | 9.11                    | 0.24               |
| LOS                                    | 0.24                    | 0.03               |
| TX                                     | -0.48                   | 0.16               |
| LOS <sup>a</sup> TX                    | -0.05                   | 0.04               |
| SpS                                    | -0.46                   | 0.22               |
| LOS <sup>a</sup> splenic sequestration | -0.05                   | 0.06               |
| ACS                                    | -0.26                   | 0.14               |
| LOS <sup>a</sup> ACS                   | 0.00                    | 0.04               |
| Scale                                  | 1.66                    | 0.08               |

<sup>a</sup> Generalized linear model with logarithmic link and  $\gamma$  variance to account for skewed cost data.
